# Supplementary material for: The comprehensive profile of fermentation products during in situ CO2 recycling by Rubisco-based engineered Escherichia coli
Source: PubMed Central journal article supplement (PMC4971712; doi:10.1186/s12934-016-0530-7), 2016-08-02
Supplement: 12934_2016_530_MOESM1_ESM.pdf [file 12934_2016_530_MOESM1_ESM.pdf]

## Text S1. Supplemental Materials and Methods.

### Contents of Text S1

- a. Quantification of mRNA expression level
- b. Derivation of stoichiometric models for glucose metabolism in *E. coli*

#### a. Quantification of mRNA expression level

The expression level of mRNA of a bacterial culture can be quantified by reads per kilobase transcriptome per million mapped reads (RPKM) defined as follows (1):

$$\text{RPKM} = \frac{10^6 C}{NL/10^3}$$

where C is the reads of the target gene, N is the reads of total genes, and L is the number of bases of the target gene. To accommodate the deviation of RPKM for J3 and JB caused by the heterologous expression of Rubisco and/or PrkA, a modified RPKM (M-RPKM) is defined for strain j:

$$\text{M - RPKM} = \frac{10^6 C}{N' L/10^3}$$

where  $N'$  is calculated by subtracting the reads of *rbcLS* and/or *prkA* from the reads of total genes.

The differential expression of mRNA between wild-type *E. coli* BL21(DE3) and strain j is now as follows:

$$\log_2 \text{Ratio} = \frac{\text{M - RPKM}_{j,x}}{\text{RPKM}_{\text{BL21(DE3),x}}}$$

where  $\text{M-RPKM}_{j,x}$  is the modified RPKM of gene x for strain j where  $\text{RPKM}_{\text{BL21(DE3),x}}$  is the RPKM of gene x for wild-type *E. coli* BL21(DE3). It is suggested that a statistically significant  $\log_2 \text{Ratio}$  should be accompanied by a p-value of less than  $1 \times 10^{-3}$  and a FDR of less than 0.05 (2).

#### b. Derivation of stoichiometric models for glucose metabolism in *E. coli*.

- (a) glucose + 2 ADP + 2 NADH → 2 ethanol + 2 formate + 2 ATP + 2 NAD<sup>+</sup>
- (b) glucose + 4 ADP + 2 NAD<sup>+</sup> → 2 acetate + 2 formate + 4 ATP + 2 NADH
- (c) glucose + 4.8 NADH → 2.4 ethanol + 1.2 formate + 4.8 NAD<sup>+</sup>
- (d) glucose + 2.4 ADP → 2.4 acetate + 1.2 formate + 2.4 ATP

#### (a) glucose + 2 ADP + 2 NADH → 2 ethanol + 2 formate + 2 ATP + 2 NAD<sup>+</sup>

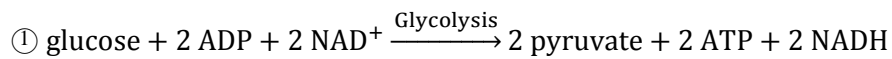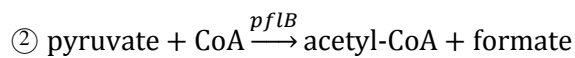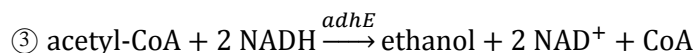

(a) can be derived from ①+②×2+③×2

**(b) glucose + 4 ADP + 2 NAD<sup>+</sup> → 2 acetate + 2 formate + 4 ATP + 2 NADH**

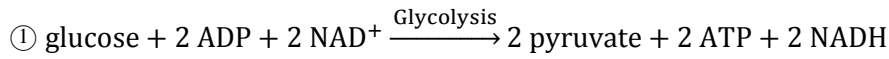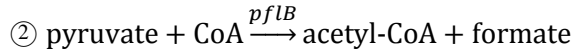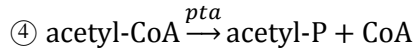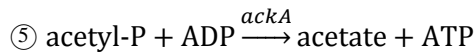

(b) can be derived from ①+②×2+④×2+⑤×2

**(c) glucose + 4.8 NADH → 2.4 ethanol + 1.2 formate + 4.8 NAD<sup>+</sup>**

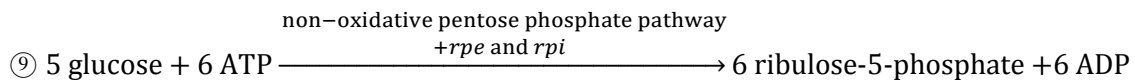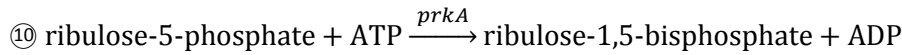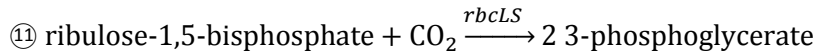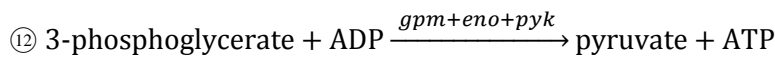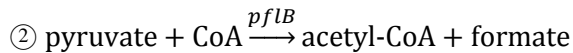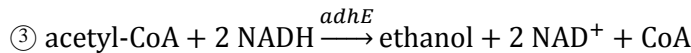

(c) can be derived from ⑨×0.2+(⑩+⑪)×1.2+(⑫+②+③)×2.4

**(d) glucose + 2.4 ADP → 2.4 acetate + 1.2 formate + 2.4 ATP**

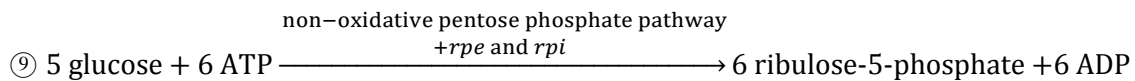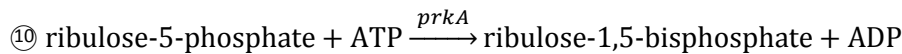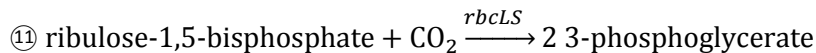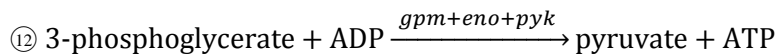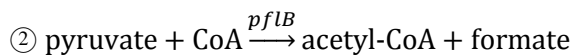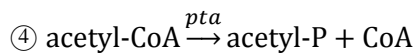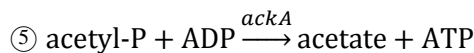

(d) can be derived from ⑨×0.2+(⑩+⑪)×1.2+(⑫+②+④+⑤)×2.4

## References

1. **Mortazavi A, Williams BA, McCue K, Schaeffer L, Wold B.** 2008. Mapping and quantifying mammalian transcriptomes by RNA-Seq. *Nat Meth* **5**:621-628.
2. **Benjamini Y, Yekutieli D.** 2001. The control of the false discovery rate in multiple testing under dependency. **29**:1165-1188.

## SUPPLEMENTAL MATERIALS

**Table S1.** Primers used for gene disruption and site-directed mutagenesis.

| Name               | Sequence                                                                   |
|--------------------|----------------------------------------------------------------------------|
| LDH-HP1            | AAATATTTTTAGTAGCTTAAATGTGATTCAACATCACTGGA<br>GAAAGTCTTGTGTAGGCTGGAGCTGCTTC |
| LDH-HP2            | ATTGGGGATTATCTGAATCAGCTCCCCTGGGTTGCAGGGGAG<br>CGGCAAGAATTCCGGGGATCCGTCGACC |
| LDH-U              | AAATATTTTTAGTAGCTTAA                                                       |
| KANK2- k2          | CGGTGCCCTGAATGAACTGC                                                       |
| FRDhf-NEW-HP1      | CTTACCCTGAAGTACGGGGCTGTGGGATAAAAACAATCTG<br>GAGGAATGTCGTGTAGGCTGGAGCTGCTTC |
| FRDhr-NEW-HP2      | CCATACAAAACGGCCCGCCATAGGCGGGCCGGATTTACATTG<br>GCGATGCGATTCCGGGGATCCGTCGACC |
| FRD-U              | CTTACCCTGAAGTACGGGGC                                                       |
| rbcL-K198G-F       | GGACTTCACCGGTGACGACGAAAACATCAACTCGC                                        |
| rbcL-K198G-R       | AGACCGCCGCGCAGACAT                                                         |
| rbcL-D200G-E201G-F | CACCAAAGACGGTGGTAACATCAACTCGCAGCCGTTCCAAC                                  |
| rbcL-D200G-E201G-R | AAGTCCAGACCGCCGCGC                                                         |
| rbcL-K172G-F       | TTGCACGATCGGTCCAAAACCTCGGTCTGTGCGGCG                                       |
| rbcL-K172G-R       | CCCAGCATCGGACGGCCG                                                         |
| rbcL-K331G-F       | CGTCGTGCGCGGTCTGGAAGGCGAC                                                  |
| rbcL-K331G-R       | GTGCCGGAGTGGAGGTGG                                                         |

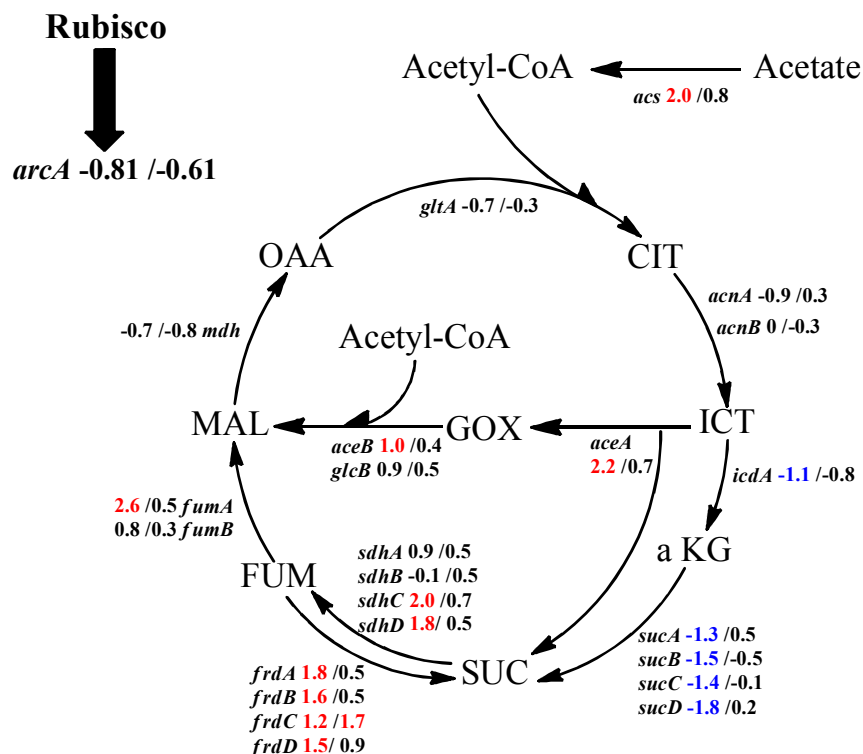

**Fig. S1** The transcriptome of *E. coli* strains J3 (first value) and JB (second value) regarding the glyoxylate shunt. Values for each gene are  $\log_2$ Ratio that are defined in Text S1. All  $\log_2$ Ratio reported here are statistically significant where all p-values are less than  $1 \times 10^{-3}$  and all False Discovery Rates (FDRs) are less than 0.05. The pathway was constructed based on KEGG (Kyoto Encyclopedia of Genes and Genomes) database. Abbreviation: CIT, citrate; ICT, isocitrate; GOX, glyoxylate;  $\alpha$ -KG,  $\alpha$ -ketoglutarate; SUC, succinate; FUM, fumarate; MAL, malate; OAA, oxaloacetate.

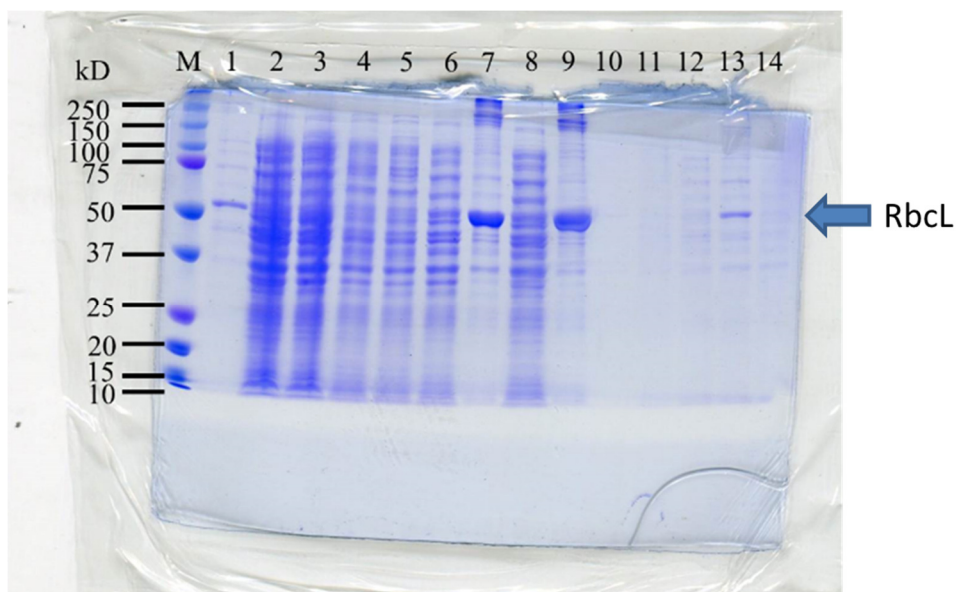

**Fig. S2** SDS-PAGE for confirming the overexpression of Rubisco (K198G). M, Marker; lane 1, MZLF3(K198G)+IPTG (supernatant); lane 2, *E. coli* BL21(DE3) (whole cell); lane 3, *E. coli* BL21(DE3)+IPTG (whole cell); lane 4, MZLF (whole cell); lane 5, MZLF+IPTG (whole cell); lane 6, MZLF3 (whole cell); lane 7, MZLF3+IPTG (whole cell); lane 8, MZLF3(K198G) (whole cell); lane 9, MZLF3(K198G)+IPTG (whole cell); lane 12, MZLF3+IPTG (supernatant); lane 13, MZLF3+IPTG (supernatant); lane 14, MZLF3(K198G) (supernatant).
